# Supplementary material
Source: HighWire-hosted journal article supplement (https://bmjleader.bmj.com/highwire/filestream/2207/field_highwire_adjunct_files/1/leader-2021-000542supp002_data_supplement.pdf)
Supplement: leader-2021-000542supp002_data_supplement.pdf [file leader-2021-000542supp002_data_supplement.pdf]

**Appendix B: Data Abstraction Form Headings**

| <b>Categories included in Data Abstraction Form</b> |                                                                                                                                                                                                                                                                                                                                                              |
|-----------------------------------------------------|--------------------------------------------------------------------------------------------------------------------------------------------------------------------------------------------------------------------------------------------------------------------------------------------------------------------------------------------------------------|
| Physician Leadership Programs                       | <ul style="list-style-type: none"> <li>• Name of Host Institution (e.g., university name)</li> <li>• Country of Host Institution</li> <li>• Program Title</li> <li>• General or targeted program</li> <li>• Program cost</li> <li>• Program type (program/seminar/fellowship)</li> <li>• Presence/Type of EDI content</li> </ul>                             |
| Peer Reviewed Literature                            | <ul style="list-style-type: none"> <li>• Name of Program(s) evaluated</li> <li>• Study characteristics</li> <li>• Country</li> <li>• Curriculum/pedagogy</li> <li>• Theoretical approaches</li> <li>• Presence of EDI</li> <li>• Methodology</li> <li>• Evaluation outcomes</li> <li>• Limitations</li> <li>• Recommendations for future research</li> </ul> |
| Conferences                                         | <ul style="list-style-type: none"> <li>• Name of conference</li> <li>• Year of the conference</li> <li>• Country of the host organization</li> <li>• Presence of EDI terms</li> <li>• Category/Type of EDI content</li> </ul>                                                                                                                                |
